# Supplementary material for: Stretchable heaters with composites of an intrinsically conductive polymer, reduced graphene oxide and an elastomer for wearable thermotherapy
Source: Royal Society of Chemistry journal article supplement (doi:10.1039/c6tc04849h), 2017-01-01
Supplement: c6tc04849h1.pdf [file c6tc04849h1.pdf]

## Supporting Information

### **Stretchable Heaters with Composites of an Intrinsically Conductive Polymer, Reduced Graphene Oxide and an Elastomer for Wearable Thermotherapy**

*Rui Zhou, Pengcheng Li,\* Zeng Fan, Donghe Du, and Jianyong Ouyang\**

Department of Materials Science & Engineering, National University of Singapore, 7 Engineering Drive 1 117574, Singapore

Corresponding Author

\*E-mail: [mseoj@nus.edu.sg](mailto:mseoj@nus.edu.sg) (Jianyong Ouyang)

\*E-mail: [pengchengli2013@gmail.com](mailto:pengchengli2013@gmail.com) (Pengcheng Li)

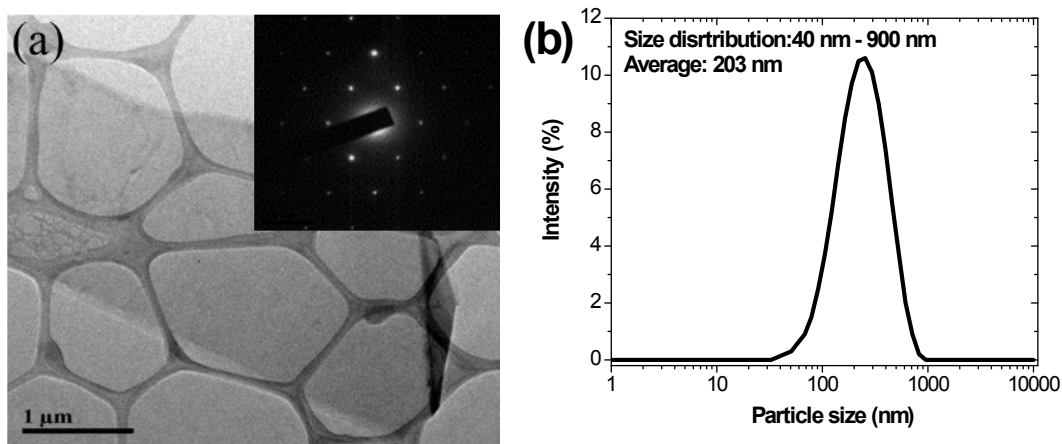

**Fig. S1.** (a) TEM image and selected area electron diffraction pattern of GO and (b) Dynamic light scattering (DLS) results of graphene oxide dispersion

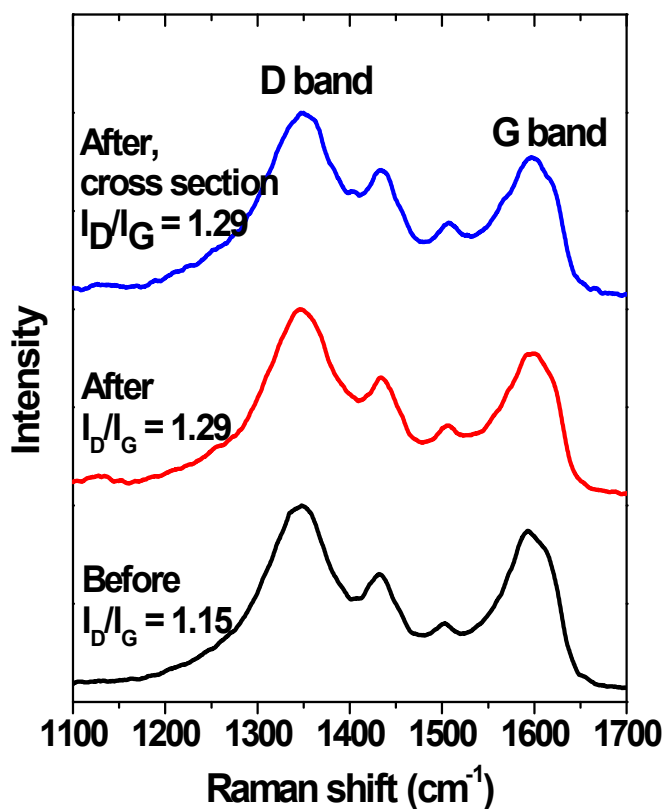

**Fig. S2.** Raman spectra of a WPU/PEDOT:PSS/1 wt% GO composite film before and after the reduction of GO with a HI solution(both surface and cross section).

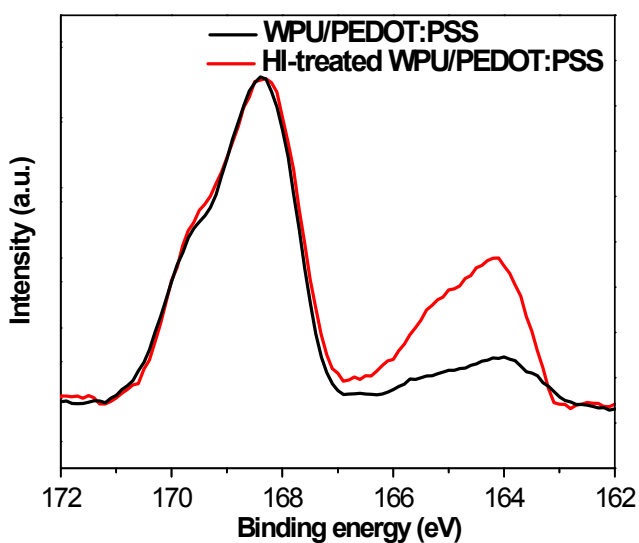

**Fig. S3.** S2p XPS spectra of WPU/PEDOT:PSS and HI-treated WPU/PEDOT:PSS blend films.

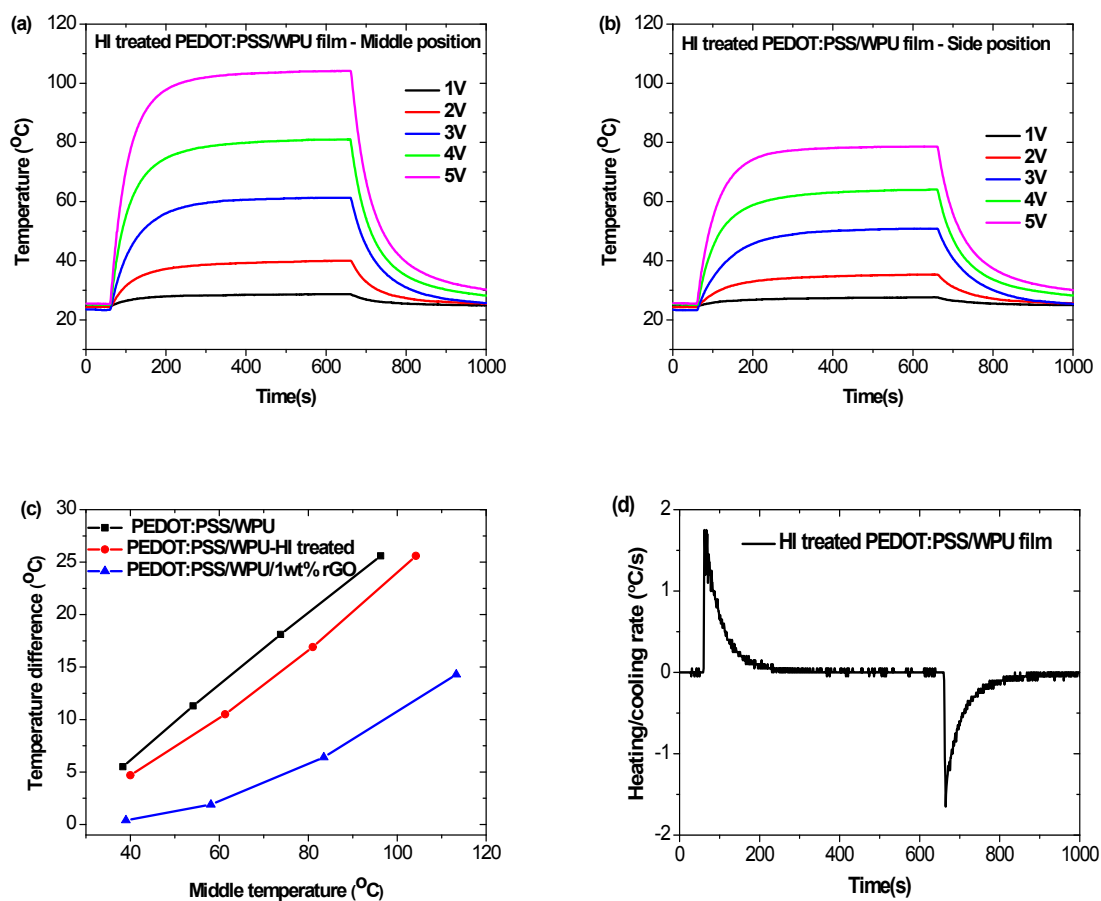

**Fig. S4.** Time-dependent temperature profiles of a HI treated WPU/PEDOT:PSS blend film in the (a) middle and (b) side position, and (c) middle-to-side temperature difference of

PEDOT:PSS/WPU, HI-treated PEDOT:PSS/WPU and PEDOT:PSS/WPU/1 wt% rGO films as a function of middle position temperature. (d) The variation of the temperature derivative with the time at the applied voltage of 5 V for a HI treated WPU/PEDOT:PSS film.

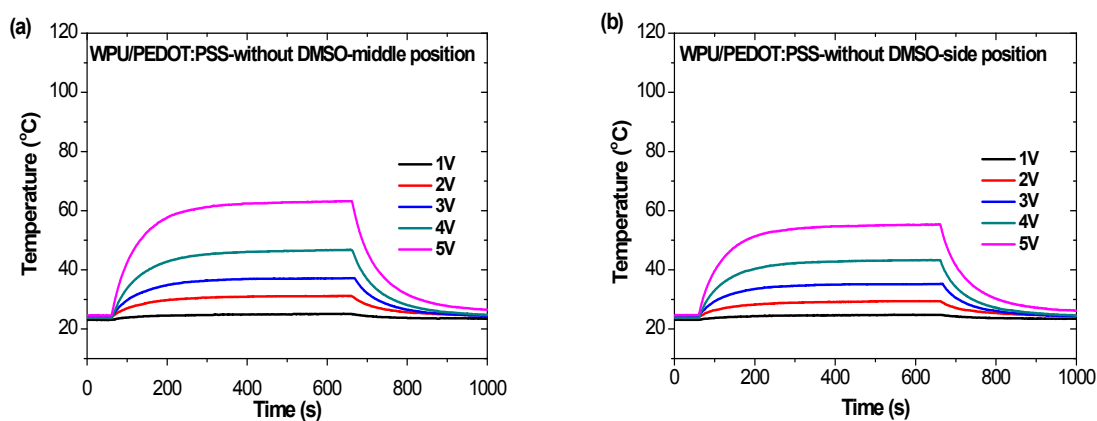

**Fig. S5.** Time-dependent temperature profiles of a 5wt% PEDOT:PSS/WPU film without addition of DMSO in the (a) middle and (b) side position, which indicate that the heating rate of 5wt% PEDOT:PSS/WPU film without addition of DMSO (conductivity:  $4.2 \text{ S cm}^{-1}$ ) under same voltage is lower than that of 5wt% PEDOT:PSS/WPU film with addition of DMSO (conductivity:  $12.5 \text{ S cm}^{-1}$ ).

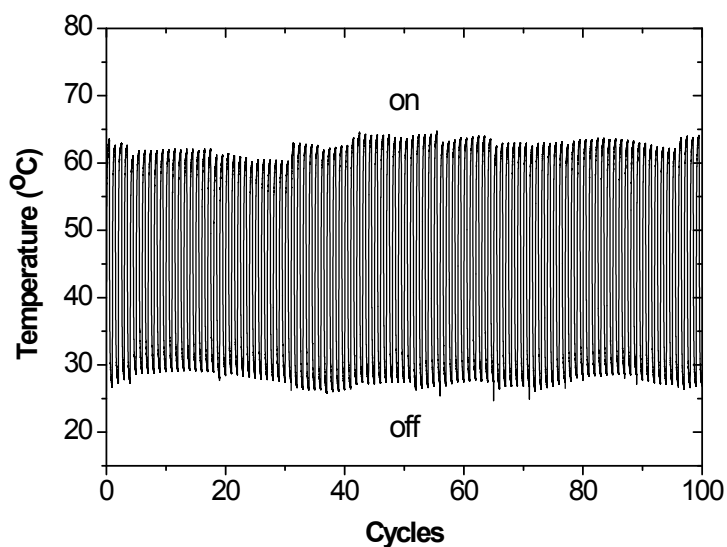

**Fig. S6.** Temperature on/off responses of a WPU/PEDOT:PSS/1wt% rGO composite film under a voltage of 3 V for 100 cycles.

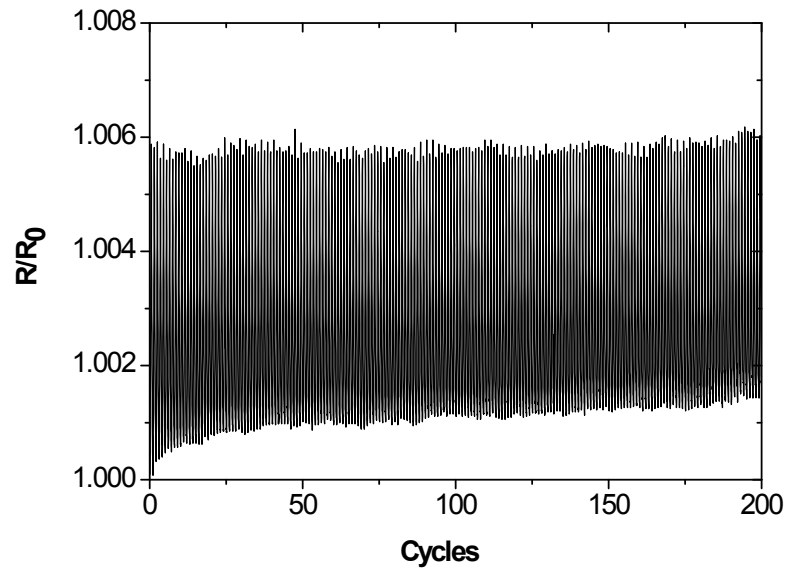

**Fig. S7.** The relative resistance ( $R/R_0$ ) in the stretch and release cycles with a strain of 20% for the WPU/PEDOT:PSS/1wt% rGO films with prestretching.
